# Supplementary material
Source: ML conference proceedings conference paper supplement (https://proceedings.neurips.cc/paper_files/paper/2018/hash/f3e52c300b822a8123e7ace55fe15c08-Abstract.html)
Supplement: Supplementary file [file f3e52c300b822a8123e7ace55fe15c08-Supplemental.zip]

## A Proof of Proposition 2

We first show the following lemma.

**Lemma 1.** *Let  $\{a_i\}_{i=1}^N$  and  $\{b_i\}_{i=1}^N$  be two sequences of real numbers, where  $N < \infty$ . Let  $\{p_i\}_{i=1}^N$  be such that  $p_i \geq 0$  for all  $i$  and  $\sum_{m=1}^N p_m = 1$ . Then there exist indices  $j, k \in \{1, \dots, N\}$  (possibly  $j = k$ ) and  $p \in [0, 1]$  such that*

$$pa_j + (1-p)a_k \leq \sum_{m=1}^N a_m p_m$$

and

$$pb_j + (1-p)b_k \leq \sum_{m=1}^N b_m p_m.$$

**Proof.** We prove the lemma by induction over  $N$ . The result is trivial when  $N = 1, 2$ . Assume that the result holds when  $N = n$ . In the following we show the case where  $N = n + 1$ . Let  $A = \sum_{m=1}^{n+1} a_m p_m$  and  $B = \sum_{m=1}^{n+1} b_m p_m$ .

Suppose there exists index  $t \in \{1, \dots, n+1\}$  such that  $a_t \leq A$  and  $b_t \leq B$ , then by choosing  $j = k = t$ , there is

$$pa_j + (1-p)a_k = a_t \leq A \quad \text{and} \quad pb_j + (1-p)b_k = b_t \leq B.$$

Suppose there exists index  $t \in \{1, \dots, n+1\}$  such that  $a_t \geq A$  and  $b_t \geq B$ . Without loss of generality we can assume  $t = n+1$ . If  $p_{n+1} = 1$ , the result becomes trivial by choosing  $j = k = n+1$ . Hence we only consider  $p_{n+1} < 1$ . Let  $p'_i = p_i / (1 - p_{n+1})$  for  $i = 1, \dots, n$ , then  $\sum_{m=1}^n p'_m = 1$ . Applying our assumption to  $\{a_i\}_{i=1}^n$ ,  $\{b_i\}_{i=1}^n$  and  $\{p'_i\}_{i=1}^n$ , we can find  $j', k' \in \{1, \dots, n\}$  and  $p' \in [0, 1]$  such that

$$p'a_{j'} + (1-p')a_{k'} \leq \sum_{m=1}^n a_m p'_m$$

and

$$p'b_{j'} + (1-p')b_{k'} \leq \sum_{m=1}^n b_m p'_m.$$

Notice that

$$\sum_{m=1}^n a_m p'_m = \sum_{m=1}^n \frac{a_m p_m}{1 - p_{n+1}} \leq \sum_{m=1}^{n+1} a_m p_m = A,$$

and similarly  $\sum_{m=1}^n b_m p'_m \leq B$ . Therefore by choosing  $j = j', k = k'$  and  $p = p'$ , we arrive at the result.

Consequently, we only have to consider the case where for each  $t \in \{1, \dots, n+1\}$ , either  $a_t > A, b_t < B$  or  $a_t < A, b_t > B$ . Without loss of generality, let  $s$  be the index such that  $a_t > A, b_t < B, \forall t \in \{1, \dots, s\}$  and  $a_t < A, b_t > B, \forall t \in \{s+1, \dots, n+1\}$ . Suppose the result is false, then for any  $\ell \in \{1, \dots, s\}$  and  $h \in \{s+1, \dots, n+1\}$ , the following set of inequalities

$$\begin{cases} pa_\ell + (1-p)a_h \leq A \\ pb_\ell + (1-p)b_h \leq B \end{cases}$$

has no solution for  $p$ . Since  $a_\ell > A > a_h$  and  $b_\ell < B < b_h$ , this can only happen when

$$\frac{A - a_h}{a_\ell - a_h} < \frac{b_h - B}{b_h - b_\ell}.$$

Rearranging, the above inequality is equivalent to

$$b_h A - b_\ell A + a_\ell B - a_h B + a_h b_\ell - a_\ell b_h < 0. \quad (\text{A1})$$

Let  $P' = \sum_{m=1}^s p_m$ ,  $A' = \sum_{m=1}^s a_m p_m$  and  $B' = \sum_{m=1}^s b_m p_m$ . Multiplying both sides of (A1) by  $p_\ell$  and  $p_h$ , and summing over  $\ell = 1, \dots, s$  and  $h = s+1, \dots, n+1$ , we have that

$$\begin{aligned} 0 &> \sum_{\ell=1}^s \sum_{h=s+1}^{n+1} \left( b_h p_h p_\ell A - b_\ell p_\ell p_h A + a_\ell p_\ell p_h B - a_h p_h p_\ell B + a_h p_h b_\ell p_\ell - a_\ell p_\ell b_h p_h \right) \\ &= (B - B')P'A - B'(1 - P')A + A'(1 - P')B - (A - A')P'B + (A - A')B' - A'(B - B') \\ &= 0, \end{aligned}$$

which is a contradiction. Therefore the result holds for  $N = n + 1$ .  $\square$

To show Proposition 2, for each  $t$  we construct  $\tilde{\theta}_t^*$  that satisfies (i), (ii) and (iii). Notice that, for each  $k = 1, \dots, K$ , there is

$$\begin{aligned} \mathbb{E}_{t-1} \left[ \mu(\alpha(\theta_t), \theta^*) | \theta_t \in \Theta_k \right] &= \sum_{\theta \in \Theta_k} \mathbb{P}(\theta_t = \theta | \theta_t \in \Theta_k) \mathbb{E}_{t-1} \left[ \mu(\alpha(\theta), \theta^*) | \theta_t \in \Theta_k \right] \\ &= \sum_{\theta \in \Theta_k} \mathbb{P}(\theta_t = \theta | \theta_t \in \Theta_k) \mathbb{E}_{t-1} \left[ \mu(\alpha(\theta), \theta^*) \right], \end{aligned} \quad (\text{A2})$$

and

$$\begin{aligned} I_{t-1}(\psi; Y_{\alpha(\theta_t)} | \theta_t \in \Theta_k) &= \sum_{\theta \in \Theta_k} \mathbb{P}(\theta_t = \theta | \theta_t \in \Theta_k) I_{t-1}(\psi; Y_{\alpha(\theta)} | \theta_t \in \Theta_k) \\ &= \sum_{\theta \in \Theta_k} \mathbb{P}(\theta_t = \theta | \theta_t \in \Theta_k) I_{t-1}(\psi; Y_{\alpha(\theta)}), \end{aligned} \quad (\text{A3})$$

where we used the fact that  $\theta_t$  is independent of  $\theta^*$  and  $\psi$ .

According to Lemma 1, at stage  $t$ , for each  $k = 1, \dots, K$ , there exists two parameters  $\theta_1^{k,t}, \theta_2^{k,t} \in \Theta_k$  and  $r_{k,t} \in [0, 1]$ , such that

$$r_{k,t} \cdot \mathbb{E}_{t-1} \left[ \mu(\alpha(\theta_1^{k,t}), \theta^*) \right] + (1 - r_{k,t}) \cdot \mathbb{E}_{t-1} \left[ \mu(\alpha(\theta_2^{k,t}), \theta^*) \right] \leq \mathbb{E}_{t-1} \left[ \mu(\alpha(\theta_t), \theta^*) | \theta_t \in \Theta_k \right], \quad (\text{A4})$$

and

$$r_{k,t} \cdot I_{t-1}(\psi; Y_{\alpha(\theta_1^{k,t})}) + (1 - r_{k,t}) \cdot I_{t-1}(\psi; Y_{\alpha(\theta_2^{k,t})}) \leq I_{t-1}(\psi; Y_{\alpha(\theta_t)} | \theta_t \in \Theta_k). \quad (\text{A5})$$

Let  $\tilde{\theta}_t^*$  be a random variable such that

$$\mathbb{P}_{t-1}(\tilde{\theta}_t^* = \theta_1^{k,t} | \psi = k) = r_{k,t}, \quad \mathbb{P}_{t-1}(\tilde{\theta}_t^* = \theta_2^{k,t} | \psi = k) = 1 - r_{k,t}, \quad (\text{A6})$$

and let  $\tilde{\theta}_t$  be an iid copy of  $\tilde{\theta}_t^*$ . Since the value of  $\tilde{\theta}_t^*$  only depends on  $\psi$ , (i) is satisfied. Also we have that

$$\begin{aligned} I_{t-1}(\psi; (\tilde{\theta}_t, Y_{\alpha(\tilde{\theta}_t)})) &= I_{t-1}(\psi; \tilde{\theta}_t) + I_{t-1}(\psi; Y_{\alpha(\tilde{\theta}_t)} | \tilde{\theta}_t) \\ &\stackrel{(a)}{=} I_{t-1}(\psi; Y_{\alpha(\tilde{\theta}_t)} | \tilde{\theta}_t) \\ &= \sum_{k=1}^K \sum_{i=1,2} \mathbb{P}(\tilde{\theta}_t = \theta_i^{k,t} | \theta_t \in \Theta_k) \cdot \mathbb{P}(\theta_t \in \Theta_k) I_{t-1}(\psi; Y_{\alpha(\theta_i^{k,t})}) \\ &= \sum_{k=1}^K \left[ r_{k,t} \cdot I_{t-1}(\psi; Y_{\alpha(\theta_1^{k,t})}) + (1 - r_{k,t}) \cdot I_{t-1}(\psi; Y_{\alpha(\theta_2^{k,t})}) \right] \cdot \mathbb{P}(\theta_t \in \Theta_k) \\ &\stackrel{(b)}{\leq} I_{t-1}(\psi; Y_{\alpha(\theta_t)} | \theta_t \in \Theta_k) \cdot \mathbb{P}(\theta_t \in \Theta_k) \\ &= I_{t-1}(\psi; Y_{\alpha(\theta_t)}) \\ &\stackrel{(c)}{=} I_{t-1}(\psi; Y_{\alpha(\theta_t)} | \theta_t) + I_{t-1}(\psi; \theta_t) = I_{t-1}(\psi; (\theta_t, Y_{\alpha(\theta_t)})), \end{aligned} \quad (\text{A7})$$

where (a) and (c) follows from that both  $\theta_t$  and  $\tilde{\theta}_t$  are independent of  $\psi$ , conditioned on  $\tilde{\mathcal{H}}_{t-1}$ , and (b) follows from (A5). Therefore (iii) is satisfied.

To show (ii), By construction we have that, at each stage  $t = 1, \dots, T$ ,

$$D_t = r_{k,t} \cdot \mathbb{E}_{t-1} \left[ \mu(\alpha(\theta_1^{k,t}), \theta^*) \right] + (1-r_{k,t}) \cdot \mathbb{E}_{t-1} \left[ \mu(\alpha(\theta_2^{k,t}), \theta^*) \right] - \mathbb{E}_{t-1} \left[ \mu(\alpha(\theta_t), \theta^*) | \theta_t \in \Theta_k \right] \leq 0.$$

Hence there is

$$\begin{aligned} \mathbb{E}_{t-1} \left[ R(Y_{\alpha(\tilde{\theta}_t)}) - R(Y_{\alpha(\theta_t)}) \right] &= \mathbb{E}_{t-1} \left[ \mu(\alpha(\tilde{\theta}_t), \theta^*) - \mu(\alpha(\theta_t), \theta^*) \right] \\ &= \sum_{k=1}^K \mathbb{P}(\theta_t \in \Theta_k) \cdot \mathbb{E}_{t-1} \left[ \mu(\alpha(\tilde{\theta}_t), \theta^*) - \mu(\alpha(\theta_t), \theta^*) \mid \theta_t \in \Theta_k \right] \\ &= \sum_{k=1}^K \mathbb{P}(\theta_t \in \Theta_k) \cdot D_t \leq 0. \end{aligned} \quad (\text{A8})$$

Therefore we arrive at

$$\begin{aligned} &\mathbb{E}_{t-1} \left[ R^* - R(Y_{\alpha(\theta_t)}) \right] - \mathbb{E}_{t-1} \left[ R(Y_{\alpha(\tilde{\theta}_t^*)}) - R(Y_{\alpha(\tilde{\theta}_t)}) \right] \\ &= \mathbb{E}_{t-1} \left[ R(Y_{\alpha(\theta^*)}) - R(Y_{\alpha(\tilde{\theta}_t^*)}) \right] + \mathbb{E}_{t-1} \left[ R(Y_{\alpha(\tilde{\theta}_t)}) - R(Y_{\alpha(\theta_t)}) \right] \\ &\leq \mathbb{E}_{t-1} \left[ \mu(\alpha(\theta^*), \theta^*) - \mu(\alpha(\tilde{\theta}_t^*), \theta^*) \right] \\ &\leq \epsilon, \end{aligned} \quad (\text{A9})$$

where the final step comes from the fact that  $\theta^*$  and  $\tilde{\theta}_t^*$  are always in the same partition.

## B Proof of Proposition 3

First, for two random parameters  $\theta$  and  $\theta'$  we define

$$\tilde{\Gamma}_t(\theta; \theta') = \frac{\mathbb{E}_{t-1} \left[ R(Y_{\alpha(\theta)}) - R(Y_{\alpha(\theta')}) \right]^2}{I_{t-1}(\theta; (\theta', Y_{\alpha(\theta')}))}, \quad (\text{A10})$$

where the subscript  $t-1$  indicates the corresponding value under base measure  $\tilde{\mathcal{H}}_{t-1}$ . From the definition,  $\tilde{\Gamma}_t(\theta; \theta')$  is a random variable measurable with respect to  $\sigma(\tilde{\mathcal{H}}_{t-1})$ .

**Lemma 2.** *We have that, for each  $t = 1, \dots, T$ ,*

$$\begin{aligned} I_{t-1}(\tilde{\theta}_t^*; (\tilde{\theta}_t, Y_{\alpha(\tilde{\theta}_t)})) &= \sum_{i=1}^m \mathbb{P}_{t-1}(\tilde{\theta}_t = \theta^i) I_{t-1}(\tilde{\theta}_t^*; Y_{\alpha(\theta^i)}) \\ &\geq 2 \sum_{i=1}^m \sum_{j=1}^m \mathbb{P}_{t-1}(\tilde{\theta}_t^* = \theta^i) \mathbb{P}_{t-1}(\tilde{\theta}_t^* = \theta^j) \cdot \\ &\quad \left\{ \mathbb{E}_{t-1} [R(Y_{\alpha(\theta^i)}) | \tilde{\theta}_t^* = \theta^j] - \mathbb{E}_{t-1} [R(Y_{\alpha(\theta^i)})] \right\} \end{aligned}$$

and

$$\mathbb{E}_{t-1} [R(Y_{\tilde{\theta}_t^*}) - R(Y_{\tilde{\theta}_t})] = \sum_{i=1}^m \mathbb{P}_{t-1}(\tilde{\theta}_t^* = \theta^i) \left\{ \mathbb{E}_{t-1} [R(Y_{\alpha(\theta^i)}) | \tilde{\theta}_t^* = \theta^i] - \mathbb{E}_{t-1} [R(Y_{\alpha(\theta^i)})] \right\},$$

almost surely.

**Proof.** For each  $t = 1, \dots, T$ , there is

$$\begin{aligned}
I_{t-1}(\tilde{\theta}_t^*; (\tilde{\theta}_t, Y_{\alpha(\tilde{\theta}_t)})) &= I_{t-1}(\tilde{\theta}_t^*; \tilde{\theta}_t) + I_{t-1}(\tilde{\theta}_t^*; Y_{\alpha(\tilde{\theta}_t)} | \tilde{\theta}_t) \\
&\stackrel{(d)}{=} I_{t-1}(\tilde{\theta}_t^*; Y_{\alpha(\tilde{\theta}_t)} | \tilde{\theta}_t) \\
&= \sum_{i=1}^m \mathbb{P}(\tilde{\theta}_t = \theta^i) \cdot I_{t-1}(\tilde{\theta}_t^*; Y_{\alpha(\tilde{\theta}_t)} | \tilde{\theta}_t = \theta^i) \\
&= \sum_{i=1}^m \mathbb{P}(\tilde{\theta}_t^* = \theta^i) \cdot I_{t-1}(\tilde{\theta}_t^*; Y_{\alpha(\theta^i)}) \\
&= \sum_{i=1}^m \sum_{j=1}^m \mathbb{P}(\tilde{\theta}_t^* = \theta^i) \mathbb{P}(\tilde{\theta}_t^* = \theta^j) \cdot D_{\text{KL}}(P_{t-1}(Y_{\alpha(\theta^i)} | \tilde{\theta}_t^* = \theta^j) \| P_{t-1}(Y_{\alpha(\theta^i)})) \\
&\stackrel{(e)}{\geq} 2 \sum_{i=1}^m \sum_{j=1}^m \mathbb{P}(\tilde{\theta}_t^* = \theta^i) \mathbb{P}(\tilde{\theta}_t^* = \theta^j) \cdot \left\{ \mathbb{E}_{t-1}[R(Y_{\alpha(\theta^i)}) | \tilde{\theta}_t^* = \theta^j] - \mathbb{E}_{t-1}[R(Y_{\alpha(\theta^i)})] \right\}^2,
\end{aligned}$$

where (d) comes from the fact that  $\tilde{\theta}_t^*$  and  $\tilde{\theta}_t$  are independent, conditioned on  $\mathcal{H}_{t-1}$ , and (e) follows from Pinsker's inequality and our assumption that  $\sup_{y \in \mathcal{Y}} R(y) - \inf_{y \in \mathcal{Y}} R(y) \leq 1$ .

On the other hand, there is also

$$\begin{aligned}
\mathbb{E}_{t-1}[R(Y_{\tilde{\theta}_t^*}) - R(Y_{\tilde{\theta}_t})] &= \sum_{i=1}^m \mathbb{P}_{t-1}(\tilde{\theta}_t^* = \theta^i) \mathbb{E}_{t-1}[R(Y_{\alpha(\theta^i)}) | \tilde{\theta}_t^* = \theta^i] - \\
&\quad \sum_{i=1}^m \mathbb{P}_{t-1}(\tilde{\theta}_t = \theta^i) \mathbb{E}_{t-1}[R(Y_{\alpha(\theta^i)})] \\
&= \sum_{i=1}^m \mathbb{P}_{t-1}(\tilde{\theta}_t^* = \theta^i) \left\{ \mathbb{E}_{t-1}[R(Y_{\alpha(\theta^i)}) | \tilde{\theta}_t^* = \theta^i] - \mathbb{E}_{t-1}[R(Y_{\alpha(\theta^i)})] \right\}.
\end{aligned}$$

All equalities and inequalities hold almost surely. Thus the proof is complete.  $\square$

**Lemma 3.** For each  $t = 1, 2, \dots$ , there is

$$\tilde{\Gamma}_t(\tilde{\theta}_t^*; \tilde{\theta}_t) \leq \frac{d}{2}, \quad \text{a.s.}$$

**Proof.** Fix  $t \in \{1, \dots, T\}$ , and let

$$q_i = \mathbb{P}_{t-1}(\tilde{\theta}_t^* = \theta^i), \quad s_i = \mathbb{E}_{t-1}[\theta^* | \tilde{\theta}_t^* = \theta^i], \quad i = 1, \dots, m,$$

and  $s = \mathbb{E}_{t-1}[\theta^*]$ . The linearity of expectation gives us

$$\mathbb{E}_{t-1}[R(Y_{\alpha(\theta^i)}) | \tilde{\theta}_t^* = \theta^j] = \alpha(\theta^i)^\top s_j, \quad \mathbb{E}_{t-1}[R(Y_{\alpha(\theta^i)})] = \alpha(\theta^i)^\top s, \quad \forall i, j \in \{1, \dots, m\}.$$

From Lemma 2, we have

$$\begin{aligned}
\tilde{\Gamma}_t(\tilde{\theta}_t^*; \tilde{\theta}_t) &= \frac{\mathbb{E}_{t-1}[R(Y_{\alpha(\tilde{\theta}_t^*)}) - R(Y_{\alpha(\tilde{\theta}_t)})]^2}{I_{t-1}(\tilde{\theta}_t^*; (\tilde{\theta}_t, Y_{\alpha(\tilde{\theta}_t)}))} \\
&\leq \frac{\left( \sum_{i=1}^m q_i (\alpha(\theta^i)^\top s_i - \alpha(\theta^i)^\top s) \right)^2}{2 \sum_{i=1}^m \sum_{j=1}^m q_i q_j (\alpha(\theta^i)^\top s_j - \alpha(\theta^i)^\top s)^2} \\
&= \frac{\left( \sum_{i=1}^m q_i \alpha(\theta^i)^\top (s_i - s) \right)^2}{2 \sum_{i=1}^m \sum_{j=1}^m q_i q_j [\alpha(\theta^i)^\top (s_j - s)]^2} \quad \text{a.s.}
\end{aligned}$$

Let  $u_i = \sqrt{q_i} \alpha(\theta^i)$  and  $v_i = \sqrt{q_i} (s_i - s)$ , then  $u_i, v_i \in \mathbb{R}^d$  for  $i = 1, \dots, m$ . Consider the matrix

$$M = (u_i^\top v_j)_{i,j=1}^m = \begin{pmatrix} u_1^\top \\ u_2^\top \\ \vdots \\ u_m^\top \end{pmatrix} (v_1 \quad v_2 \quad \dots \quad v_m).$$

Notice that  $M$  is the product of an  $m \times d$  matrix and a  $d \times m$  matrix, hence  $\text{rank}(M) \leq d$ . Therefore we have

$$\tilde{\Gamma}_t(\tilde{\theta}_t^*, \tilde{\theta}_t) \leq \frac{\text{Trace}(M)^2}{2\|M\|_{\text{F}}^2} \leq \frac{\text{rank}(M)}{2} \leq \frac{d}{2}, \quad \text{a.s.}$$

□

Notice that

$$\begin{aligned} \mathbb{E}[R(Y_{\alpha(\theta_1)}) - R(Y_{\alpha(\theta_2)})]^2 &\leq \mathbb{E}\left[\mathbb{E}_{t-1}[R(Y_{\alpha(\theta_1)}) - R(Y_{\alpha(\theta_2)})]^2\right] \\ &= \mathbb{E}\left[\tilde{\Gamma}_t(\theta_1; \theta_2) \cdot I_{t-1}(\theta_1; (\theta_2, Y_{\alpha(\theta_2)}))\right] \\ &\stackrel{(f)}{\leq} \frac{d}{2} \cdot \mathbb{E}\left[I_{t-1}(\theta_1; (\theta_2, Y_{\alpha(\theta_2)}))\right] \\ &= \frac{d}{2} \cdot I(\theta_1; (\theta_2, Y_{\alpha(\theta_2)}) | \tilde{\mathcal{H}}_{t-1}), \end{aligned} \quad (\text{A11})$$

where (f) comes from Lemma 3. Hence the proof is complete.

## C Proof of Proposition 4

Let  $\{\mathcal{A}_k\}_{k=1}^K$  be an  $2\epsilon$ -covering of  $\mathcal{A}$  with respect to the Euclidean norm, i.e.

$$\|a_1 - a_2\|_2 \leq 2\epsilon, \quad \forall a_1, a_2 \in \mathcal{A}_k, \quad k = 1, \dots, K.$$

Define

$$\Theta_k = \alpha^{-1}(\mathcal{A}_k) = \{\theta \in \Theta : \alpha(\theta) \in \mathcal{A}_k\}.$$

Apparently  $\{\Theta_k\}_{k=1}^K$  is a partition of  $\Theta$ . Moreover, for any  $k \in \{1, \dots, K\}$  and  $\theta_1, \theta_2 \in \Theta_k$  there is

$$\begin{aligned} |\mu(\alpha(\theta_1), \theta_2) - \mu(\alpha(\theta_2), \theta_2)| &= \frac{1}{2} |\alpha(\theta_1)^\top \theta_2 - \alpha(\theta_2)^\top \theta_2| \\ &\leq \frac{1}{2} \|\alpha(\theta_1) - \alpha(\theta_2)\|_2 \cdot \|\theta_2\|_2 \leq \epsilon, \end{aligned} \quad (\text{A12})$$

where the last inequality follows from that  $\|a_1 - a_2\|_2 \leq 2\epsilon$  and that  $\Theta \subseteq \overline{\mathbf{B}_d(0, 1)}$ .

Let  $N(S, \epsilon, \|\cdot\|)$  be the  $\epsilon$ -covering number of set  $S$  with respect to the  $\|\cdot\|$ -norm. We only have to bound  $N(\mathcal{A}, 2\epsilon, \|\cdot\|_2)$ . From a standard result,

$$N(\mathcal{A}, 2\epsilon, \|\cdot\|_2) \leq N(\overline{\mathbf{B}_d(0, 1)}, 2\epsilon, \|\cdot\|_2) \leq \left(\frac{1}{\epsilon} + 1\right)^d.$$

Therefore

$$K \leq \left(\frac{1}{\epsilon} + 1\right)^d.$$

## D Proof of Theorem 2

From Theorem 1, Propositions 3 and 4, we have that for all  $\epsilon > 0$ ,

$$\text{BayesRegret}(T; \pi^{\text{TS}}) \leq \sqrt{\frac{d}{2} \cdot d \log \left(\frac{1}{\epsilon} + 1\right)} \cdot T + \epsilon \cdot T.$$

Taking  $\epsilon = d/\sqrt{2T}$ , we arrive at

$$\begin{aligned} \text{BayesRegret}(T; \pi^{\text{TS}}) &\leq d\sqrt{\frac{T}{2}} \left( \sqrt{\log \left(1 + \frac{\sqrt{2T}}{d}\right)} + 1 \right) \\ &\leq d\sqrt{T} \cdot \sqrt{\log \left(1 + \frac{\sqrt{2T}}{d}\right)} + 1 \\ &\leq d\sqrt{T \log \left(3 + \frac{3\sqrt{2T}}{d}\right)}. \end{aligned}$$

## E Proof of Propositions 5, 6 and Theorem 3

Let  $W$  be a random variable with the same distribution as the noise  $W_a$  for all  $a \in \mathcal{A}$ . Define function  $f$  as

$$f(x) = \mathbb{E}[\phi^{-1}(x - W)].$$

For each  $a \in \mathcal{A}$ , let  $S_a = f(R_a) = \mathbb{E}[\phi^{-1}(R_a - W)|R_a]$ . Then we have

$$\begin{aligned} \mathbb{E}[S_a | \theta^* = \theta] &= \mathbb{E}[\mathbb{E}[\phi^{-1}(R_a - W)|R_a] | \theta^* = \theta] \\ &\stackrel{(g)}{=} \mathbb{E}[\mathbb{E}[\phi^{-1}(R_a - W_a)|R_a] | \theta^* = \theta] \\ &\stackrel{(h)}{=} \mathbb{E}[\mathbb{E}[a^\top \theta | R_a] | \theta^* = \theta] \\ &= a^\top \theta, \end{aligned} \tag{A13}$$

where (g) follows from the fact that  $W$  and  $W_a$  have the same distribution, and (h) results from that conditioned on  $p^* = p$ ,

$$R_a = \phi(a^\top \theta) + W_a.$$

From Lemma 3, we have that

$$\frac{\mathbb{E}_{t-1}[S_{\alpha(\tilde{\theta}_t^*)} - S_{\alpha(\tilde{\theta}_t)}]^2}{I_{t-1}(\tilde{\theta}_t^*; (\tilde{\theta}_t, S_{\alpha(\tilde{\theta}_t)}))} \leq 2d.$$

Notice that the constant is different from that in Lemma 3 since we have  $S_a \in [-1, 1]$  for all  $a \in \mathcal{A}$ , whereas in Lemma 3 there is  $R_a \in [-1/2, 1/2]$ . From data-processing inequality, since  $S_{\alpha(\tilde{\theta}_t)} = f(R_{\alpha(\tilde{\theta}_t)})$ , there should be

$$I(\tilde{\theta}_t^*; (\tilde{\theta}_t, S_{\alpha(\tilde{\theta}_t)})) \leq I(\tilde{\theta}_t^*; (\tilde{\theta}_t, R_{\alpha(\tilde{\theta}_t)})).$$

Also there is

$$\begin{aligned} \mathbb{E}[S_{\alpha(\tilde{\theta}_t^*)} - S_{\alpha(\tilde{\theta}_t)}]^2 &= \mathbb{E}[f(R_{\alpha(\tilde{\theta}_t^*)}) - f(R_{\alpha(\tilde{\theta}_t)})]^2 \\ &\geq [\inf_x f'(x)]^2 \cdot \mathbb{E}[R_{\alpha(\tilde{\theta}_t^*)} - R_{\alpha(\tilde{\theta}_t)}]^2 \\ &\stackrel{(i)}{\geq} C(\phi)^{-2} \cdot \mathbb{E}[R_{\alpha(\tilde{\theta}_t^*)} - R_{\alpha(\tilde{\theta}_t)}]^2, \end{aligned}$$

where (i) is the consequence of

$$\inf_x f'(x) = \inf_x \mathbb{E}[(\phi^{-1})'(x - W)] \geq \inf_x (\phi^{-1})'(x) = \left[ \sup_{y \in [-1, 1]} \phi'(y) \right]^{-1}.$$

Therefore there is

$$\tilde{\Gamma}_t(\tilde{\theta}_t^*; \tilde{\theta}_t) \leq 2C(\phi)^2 d$$

where  $\tilde{\Gamma}$  is defined in (A10). This proves Proposition 5.

On the other hand, let  $\{\mathcal{A}_k\}_{k=1}^K$  be an  $\epsilon/C(\phi)$ -covering of  $\mathcal{A}$  with respect to the Euclidean norm, i.e.

$$\|a_1 - a_2\|_2 \leq \epsilon/C(\phi), \quad \forall a_1, a_2 \in \mathcal{A}_k, \quad k = 1, \dots, K.$$

Define

$$\Theta_k = \alpha^{-1}(\mathcal{A}_k) = \{\theta \in \Theta : \alpha(\theta) \in \mathcal{A}_k\}.$$

Apparently  $\{\Theta_k\}_{k=1}^K$  is a partition of  $\Theta$ . Moreover, for any  $k \in \{1, \dots, K\}$  and  $\theta_1, \theta_2 \in \Theta_k$  there is

$$\begin{aligned} |\mu(\alpha(\theta_1), \theta_2) - \mu(\alpha(\theta_2), \theta_2)| &= |\phi(\alpha(\theta_1)^\top \theta_2) - \phi(\alpha(\theta_2)^\top \theta_2)| \\ &= C(\phi) \cdot |\alpha(\theta_1)^\top \theta_2 - \alpha(\theta_2)^\top \theta_2| \\ &\leq C(\phi) \cdot \|\alpha(\theta_1) - \alpha(\theta_2)\|_2 \cdot \|\theta_2\|_2 \leq \epsilon, \end{aligned} \tag{A14}$$

where the last inequality follows from that  $\|a_1 - a_2\|_2 \leq \epsilon/C(\phi)$  and that  $\Theta \subseteq \overline{\mathbf{B}_d(0, 1)}$ .

Similar as in the proof of Proposition 4,

$$N(\mathcal{A}, \epsilon/C(\phi), \|\cdot\|_2) \leq N(\overline{\mathbf{B}_d(0, 1)}, \epsilon/C(\phi), \|\cdot\|_2) \leq \left(\frac{2C(\phi)}{\epsilon} + 1\right)^d.$$

Therefore

$$K \leq \left(\frac{2C(\phi)}{\epsilon} + 1\right)^d.$$

Therefore by choosing  $\epsilon = \sqrt{2}C(\phi)d/\sqrt{T}$  in Theorem 1, we arrive at

$$\begin{aligned} \text{BayesRegret}(T; \pi^{\text{TS}}) &\leq \sqrt{2C(\phi)^2 d \cdot d \log \left(1 + \frac{\sqrt{2T}}{d}\right) \cdot T} + \sqrt{2}C(\phi)d\sqrt{T} \\ &\leq \sqrt{2}C(\phi)d\sqrt{T} \left( \sqrt{\log \left(1 + \frac{\sqrt{2T}}{d}\right)} + 1 \right) \\ &\leq 2C(\phi)d\sqrt{T} \cdot \sqrt{\log \left(1 + \frac{\sqrt{2T}}{d}\right) + 1} \\ &\leq 2C(\phi)d \sqrt{T \log \left(3 + \frac{3\sqrt{2T}}{d}\right)}. \end{aligned}$$

## F Proof of Theorem 4

For simplicity, we omit the superscript L in  $\phi^L$  throughout this proof. We first show that, for any  $\epsilon \in (0, \phi(\delta) - 1/2)$  there exists a partition  $\{\Theta_k\}_{k=1}^K$  such that (3) holds and

$$K \leq \frac{1}{\epsilon} \left(1 + \frac{2}{\delta - \phi^{-1}(\phi(\delta) - \epsilon)}\right)^d. \quad (\text{A15})$$

Let real-number sequence  $s_0, s_1, \dots, s_L$  be defined by

$$\begin{aligned} s_0 &= \phi^{-1}(\phi(\delta) - \epsilon), \\ s_1 &= \delta, \\ s_2 &= \phi^{-1}(\phi(\delta) + \epsilon), \\ s_3 &= \phi^{-1}(\phi(\delta) + 2\epsilon), \\ &\dots \\ s_{L-1} &= \phi^{-1}(\phi(\delta) + (L-2)\epsilon), \\ s_L &= 1, \end{aligned}$$

where we choose  $L$  such that  $\phi(\delta) + (L-2)\epsilon < \phi(1) \leq \phi(\delta) + (L-1)\epsilon$ . In addition, let  $s'_j = -s_j$  for  $j = 0, \dots, L$ . Notice that since  $0 < \epsilon < \phi(\delta) - 1/2$ , we have  $s_0 > 0$ . For  $\ell = 1, \dots, L-1$ , let

$$\mathcal{Q}_\ell = \{\theta \in \Theta : s_\ell < \alpha(\theta)^\top \theta \leq s_{\ell+1}\},$$

and let

$$\mathcal{Q}_0 = \{\theta \in \Theta : s_0 \leq \alpha(\theta)^\top \theta \leq s_1\}.$$

Similarly for  $\ell = 1, \dots, L-1$ , we can define

$$\mathcal{Q}'_\ell = \{\theta \in \Theta : s'_{\ell+1} < \alpha(\theta)^\top \theta \leq s'_\ell\},$$

and

$$\mathcal{Q}'_0 = \{\theta \in \Theta : s'_1 \leq \alpha(\theta)^\top \theta \leq s'_0\}.$$

From our assumption there is  $\delta \leq |\alpha(\theta)^\top \theta| \leq 1$  for all  $\theta \in \Theta$ , hence

$$\left( \bigcup_{\ell=0}^{L-1} \mathcal{Q}_\ell \right) \cup \left( \bigcup_{\ell=0}^{L-1} \mathcal{Q}'_\ell \right) = \Theta.$$

For each  $\ell = 1, \dots, L$ , let  $\{\mathcal{A}_{\ell j}\}_{j=1}^{J_\ell}$  be an  $(s_\ell - s_{\ell-1})$ -covering of  $\mathcal{A}$  with respect to the Euclidean norm, i.e. for each  $j = 1, \dots, J_\ell$ ,

$$\|a_1 - a_2\|_2 \leq s_\ell - s_{\ell-1}, \quad \forall a_1, a_2 \in \mathcal{A}_{\ell j}.$$

And let  $\{\mathcal{A}'_{\ell j}\}_{j=1}^{J'_\ell}$  be an  $(s'_{\ell-1} - s'_\ell)$ -covering of  $\mathcal{A}$  with respect to the Euclidean norm. Correspondingly, let  $\{\Theta_{\ell j}\}_{j=1}^{J_\ell}$  be defined by

$$\Theta_{\ell j} = \{\theta \in \mathcal{Q}_\ell : \alpha(\theta) \in \mathcal{A}_{\ell j}\}.$$

Then  $\{\Theta_{\ell j}\}_{j=1}^{J_\ell}$  is a partition of  $\mathcal{Q}_\ell$ , and for each  $j = 1, \dots, J_\ell$ , let  $\theta, \theta' \in \Theta_{\ell j}$ , there is

$$\begin{aligned} \mu(\alpha(\theta), \theta) - \mu(\alpha(\theta'), \theta) &= \phi(\alpha(\theta)^\top \theta) - \phi(\alpha(\theta')^\top \theta) \\ &\stackrel{(j)}{\leq} \phi(\alpha(\theta)^\top \theta) - \phi(\alpha(\theta)^\top \theta - (s_\ell - s_{\ell-1})) \\ &\stackrel{(k)}{\leq} \phi(s_\ell) - \phi(s_\ell - (s_\ell - s_{\ell-1})) = \epsilon, \end{aligned}$$

where (j) comes from that

$$\alpha(\theta)^\top \theta - \alpha(\theta')^\top \theta \leq \|\alpha(\theta) - \alpha(\theta')\|_2 \|\theta\|_2 \leq s_\ell - s_{\ell-1},$$

and (k) follows from the fact that  $\phi(x) - \phi(x - (s_\ell - s_{\ell-1}))$  is decreasing in  $x$  when  $x > s_\ell - s_{\ell-1}$ . Let  $\{\Theta'_{\ell j}\}_{j=1}^{J'_\ell}$  be the counterpart of  $\{\Theta_{\ell j}\}_{j=1}^{J_\ell}$  defined with respect to  $\{\mathcal{A}'_{\ell j}\}_{j=1}^{J'_\ell}$ , then  $\{\Theta_{\ell j}\}_{j=1}^{J_\ell} \cup \{\Theta'_{\ell j}\}_{j=1}^{J'_\ell}$  is a valid partition of  $\Theta$ . Notice that

$$s_1 - s_0 < s_2 - s_1 < \dots < s_L - s_{L-1},$$

we thence have

$$\begin{aligned} K &\leq \sum_{\ell=1}^L J_\ell + \sum_{\ell=1}^L J'_\ell \\ &\leq 2 \sum_{\ell=1}^L N(\mathcal{A}, s_\ell - s_{\ell-1}, \|\cdot\|_2) \\ &\leq 2L \cdot N(\mathcal{A}, s_1 - s_0, \|\cdot\|_2) \\ &\leq \frac{1}{\epsilon} \left( 1 + \frac{2}{\delta - \phi^{-1}(\phi(\delta) - \epsilon)} \right)^d. \end{aligned} \tag{A16}$$

Hence we have proved (A15). Let  $\Phi(x) = \delta - \phi^{-1}(\phi(\delta) - x)$ , then there is  $\Phi(0) = 0$  and  $\Phi'(0) = \frac{1}{\phi(\delta)(1-\phi(\delta))}$ . Also notice that

$$\begin{aligned} \Phi''(0) &= -(\phi^{-1})''(\phi(\delta) - x) \Big|_{x=0} \\ &= \frac{2\phi(\delta) - 1}{(\phi(\delta) - \phi(\delta)^2)^2} > 0, \end{aligned} \tag{A17}$$

where we used the fact that  $\phi(\delta) > 1/2$ . Hence for small enough  $\epsilon$ , there is  $\Phi(\epsilon) \geq \Phi'(0) \cdot \epsilon$ . Notice that from Theorem 1 and Conjecture 1, for all  $T$  and  $\epsilon > 0$  there is

$$\begin{aligned} \text{BayesRegret}(T; \pi^{\text{TS}}) &\leq \sqrt{\frac{d}{2} \cdot \log K \cdot T} + \epsilon \cdot T \\ &\leq \sqrt{\frac{d}{2} \cdot \left( -\log(\epsilon) + d \log \left( 1 + \frac{2}{\Phi(\epsilon)} \right) \right)} \cdot T + \epsilon \cdot T \end{aligned} \tag{A18}$$

Let  $\epsilon = d/\sqrt{2T}$ , for large enough  $T$  we have

$$\begin{aligned}
\text{BayesRegret}(T; \pi^{\text{TS}}) &\leq \sqrt{\frac{d}{2} \cdot \left( \log\left(\frac{\sqrt{2T}}{d}\right) + d \log\left(1 + \frac{2\sqrt{2T}}{\Phi'(0)d}\right) \right)} \cdot T + d\sqrt{\frac{T}{2}} \\
&\leq \sqrt{\frac{d(d+1)}{2}} \cdot T \cdot \left( \sqrt{\log\left(1 + \frac{2\sqrt{2T}}{\Phi'(0)d}\right)} + 1 \right) \\
&\leq \sqrt{d(d+1)T} \cdot \sqrt{\log\left(1 + \frac{2\sqrt{2T}}{\Phi'(0)d}\right) + 1} \\
&\leq 2d\sqrt{T} \cdot \sqrt{\log\left(3 + \frac{6\sqrt{2T}}{d} \cdot \frac{\beta e^{\beta\delta}}{(1 + e^{\beta\delta})^2}\right)}. \tag{A19}
\end{aligned}$$
